# Supplementary material for: HervD Atlas: a curated knowledgebase of associations between human endogenous retroviruses and diseases
Source: PubMed Central journal article supplement — Nucleic Acids Res. 2023 Oct 23;52(D1):D1315–26. doi: 10.1093/nar/gkad904 (PMC10767980; doi:10.1093/nar/gkad904), 2023-10-23
Supplement: gkad904_supplemental_file.pdf [file gkad904_supplemental_file.pdf]

**Supplementary Table 1. The number of curated factors for all HERV types collected in the HervD Atlas**

| <b>Class</b>         | <b>HERV types</b> | <b>#HERVs</b> | <b>#Diseases</b> | <b>#Associations</b> | <b>#Genes</b> | <b>#Publications</b> |
|----------------------|-------------------|---------------|------------------|----------------------|---------------|----------------------|
| <b>HERV-Terms</b>    | ERV1              | 11,069        | 51               | 32,133               | 168           | 19                   |
|                      | ERV2              | 1,981         | 36               | 7,625                | 35            | 22                   |
|                      | ERV3              | 4,735         | 43               | 9,932                | 134           | 17                   |
|                      | ERVL-MaLR         | 3,170         | 18               | 7,992                | 192           | 5                    |
|                      | Gypsy             | 59            | 10               | 66                   | 12            | 3                    |
|                      | LTR               | 35            | 3                | 35                   | 6             | 3                    |
| <b>HERV-Elements</b> | ERV1              | 380           | 97               | 1,639                | 86            | 141                  |
|                      | ERV2              | 123           | 79               | 722                  | 129           | 139                  |
|                      | ERV3              | 127           | 35               | 355                  | -             | 27                   |
|                      | ERVL-MaLR         | 83            | 8                | 166                  | 1             | 8                    |
|                      | Gypsy             | 23            | 5                | 50                   | 1             | 5                    |
|                      | LTR               | 5             | 3                | 11                   | -             | 3                    |
| <b>Total</b>         | -                 | 21,790        | 149              | 60,726               | 610           | 254                  |

### Supplementary Figure 1

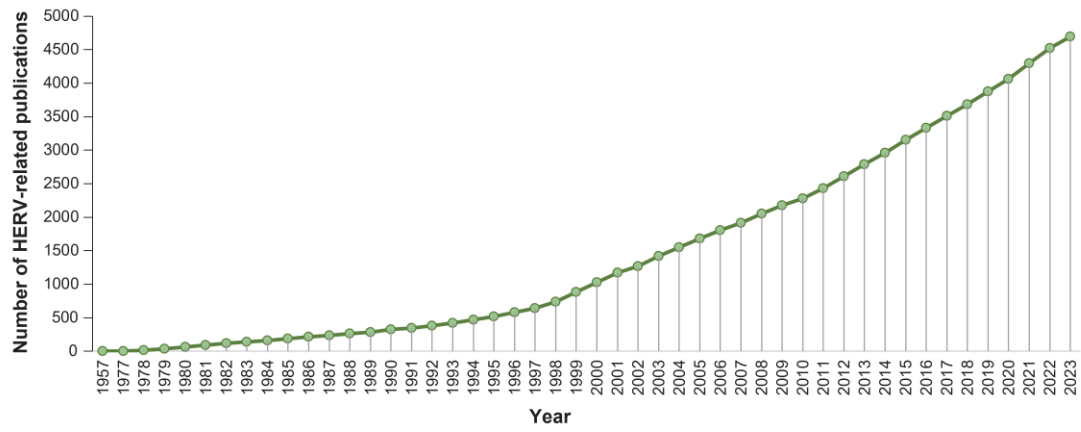

**Supplementary Figure 1.** The cumulative distribution of the 4,692 non-redundant publications associated with HERVs across different years.

## Supplementary Figure 2

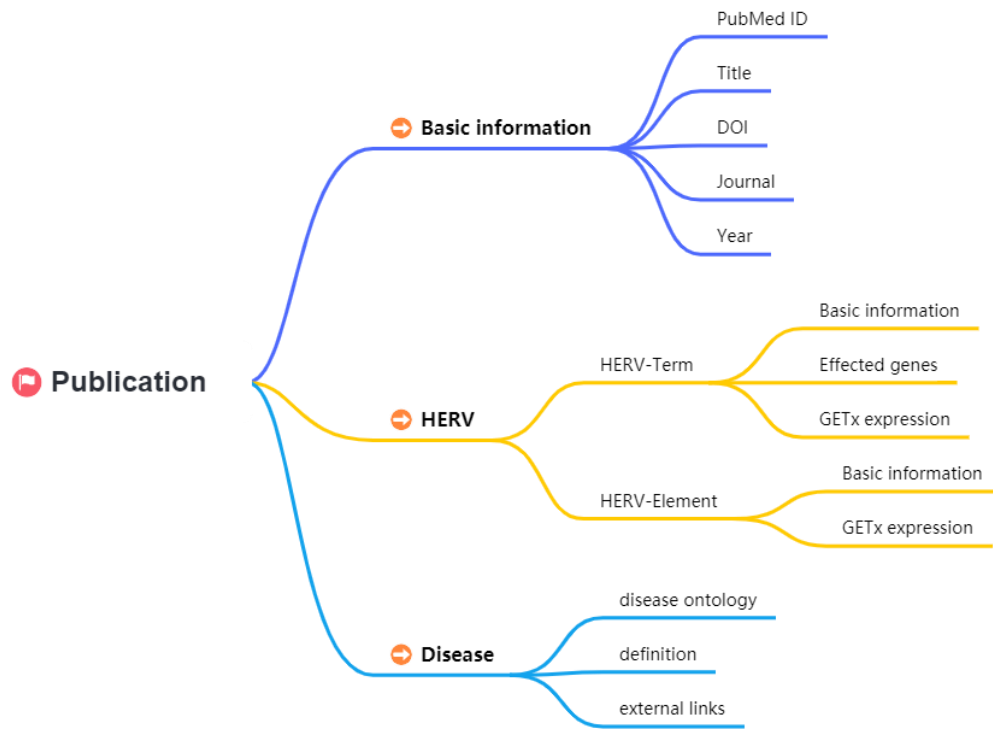

Supplementary Figure 2. An overview of the data structure of HervD Atlas.

Supplementary Figure 3

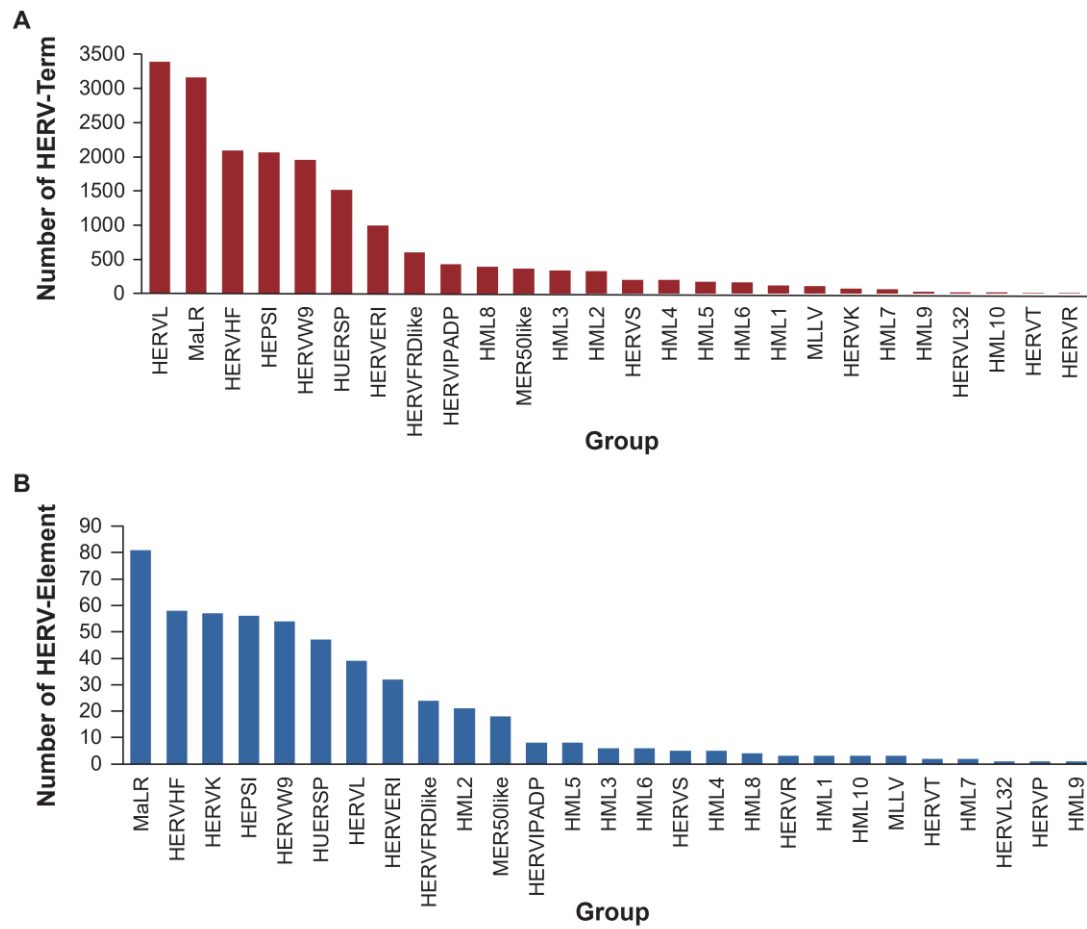

Supplementary Figure 3. The distribution of the groups in HERV-Terms (A) and HERV-Elements (B).
